# Supplementary material
Source: PubMed Central journal article supplement (PMC3258897)
Supplement: M800348200_1.pdf [file M800348200_1.pdf]

## Supplementary material

### *Re-refinement of the Mm-MIOX structure*

Attempts to re-refine the deposited 2HUO file failed initially due to the high anisotropy of the data ( $\sim 2.8$  Å resolution in the  $c^*$  direction) and the inherent instability of TLS refinement as implemented in REFMAC5 (1). However, after applying an anisotropy correction as described in Strong *et al.* (2) and removing the solvent model it was possible to perform refinement using the PHENIX package (3). After a few rounds of refinement in PHENIX, a new TLS-model was introduced based on TLSMD analysis (4). The N-terminus was rebuilt in the improved density using COOT (5) and the model was extended with the sidechain of Phe<sup>28</sup> that was now clearly visible. The main remodelling was however of the position of the backbone NH of Arg<sup>29</sup>. This entity forms a strong ionic interaction with Asp<sup>90</sup> (Fig. 2C in the main paper) but in 2HUO this NH-group was pointing outwards toward bulk water. Furthermore, the solvent model was rebuilt and a few sidechains were moved to their closest rotamer. The re-refined model belong to the upper 95<sup>th</sup> percentile in overall quality in the resolution range 1.75-2.25 Å (12522 structures) according to Molprobit (6) (2HUO belong to the upper 47<sup>th</sup> percentile).

1. Murshudov, G. N., Vagin, A. A., and Dodson, E. J. (1997) *Acta Crystallogr.* **D53**, 240-255
2. Strong, M., Sawaya, M.R., Wang, S., Phillips, M., Cascio, D. & Eisenberg, D. (2006). *PNAS*. **103**, 8060-3065

3. Adams, P.D., Grosse-Kunstleve, R.W., Hung, L.W., Ioerger, T.R., McCoy, A.J., Moriarty, N.W., Read, R.J., Sacchettini, J.C., Sauter & N.K., Terwilliger, T.C. (2002) *Acta Crystallogr.* **D58**, 1948-1954
4. Painter, J. & Merritt, E.A. (2006) *Acta Crystallogr.* **D62**, 439-450
5. Emsley, P., and Cowtan, K. (2004) *Acta Crystallogr.* **D60**, 2126-2132
6. Lovell, S.C., Davis, I.W., Arendall, W.B. 3rd, de Bakker, P.I., Word, J.M., Prisant, M.G., Richardson, J.S. and Richardson, D.C. (2003) *Proteins* **50**, 437-450.
7. Read, R.J. (1986) *Acta Crystallogr.* **A42**, 140-149.



**Figure S2.** Assignment of *myo*-inosose-1 as bound species as opposed to *myo*-inositol. A SIGMAA-weighted (7) 2Fo-Fc map (blue) at  $1\sigma$  and Fo-Fc (red) at  $-5\sigma$  is rendered from phases from a refinement where *myo*-inositol was present in the model. The final refined model of *myo*-inosose-1 is shown in gray for reference.

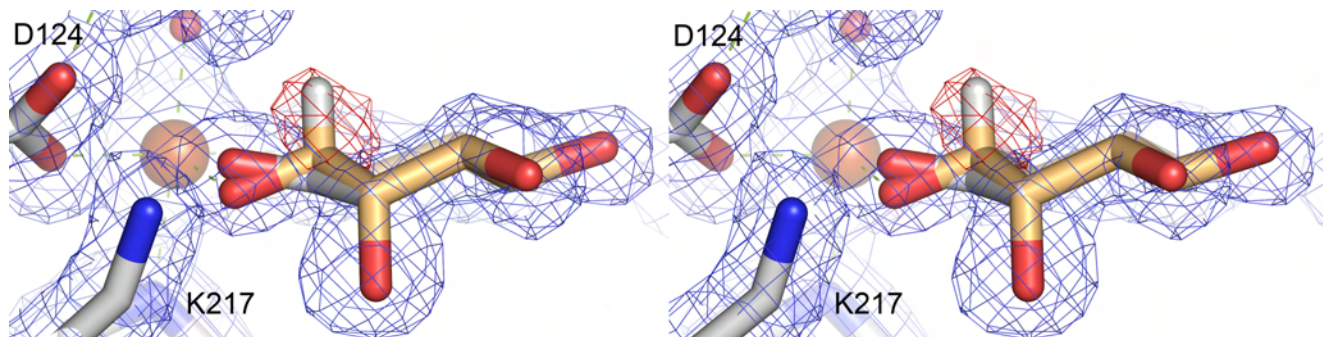

**Figure S3.** Modelling of a putative interaction between Asp<sup>85</sup> and the diiron cluster that can potentially be formed in the Lys<sup>127</sup>Ser mutant. Hs-MIOX in light brown, energy-minimised model of Lys<sup>127</sup>Ser mutant shown in green.

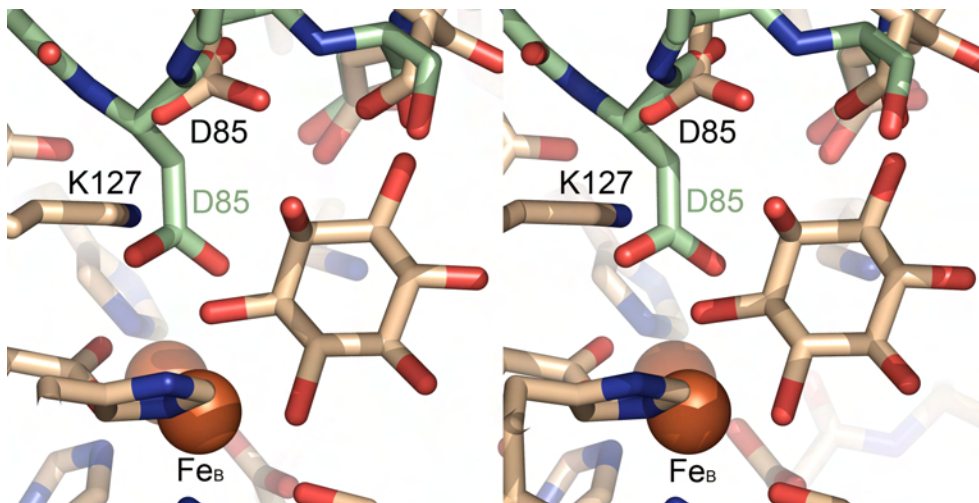

**Figure S4.** Experimental spectra of the mixed-valent state of human MIOX in the absence (upper panel, spectrum taken from Fig. 5A) and presence (lower panel, spectrum taken from Fig. 5B) of the substrate *myo*-inositol. Below each experimental spectrum there is a simulated spectrum with the following parameters for g-value and line width: Upper panel, sum of components I and II in a quantitative ratio 0.3/0.7. Component I,  $g_{\parallel} = 1.96$ ,  $g_{\perp} = 1.74$ ,  $L_{\parallel} = 25$  G,  $L_{\perp} = 160$  G; component II,  $g_{\parallel} = 1.94$ ,  $g_{\perp} = 1.72$ ,  $L_{\parallel} = 70$  G,  $L_{\perp} = 250$  G. Both components were simulated with Gaussian line shape. Lower panel: simulated spectrum with  $g_x = 1.96$ ,  $g_y = 1.82$ ,  $g_z = 1.78$ ;  $L_x = 25$  G,  $L_y = 30$  G,  $L_z = 60$  G and Gaussian line shape.

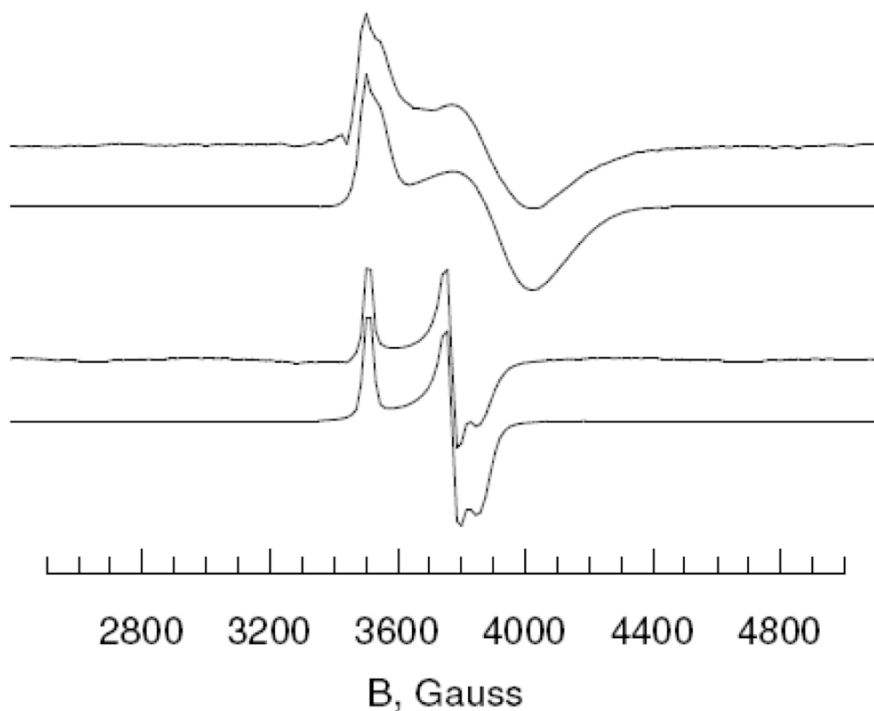

**Figure S5.** The EPR microwave saturation parameter  $P_{1/2}$  of MIOX (○) and MIOX-inositol (●) as a function of the inverse absolute temperature. Saturation recovery data were collected at 5.5, 7.0 and 10.0 K. The exchange coupling constants,  $J$  ( $H_{ex} = -2J \cdot S_1 \cdot S_2$ ), were estimated from the slopes as  $\Delta = -3J$  and were determined to be  $\sim 20 \text{ cm}^{-1}$  for MIOX and  $\sim 10 \text{ cm}^{-1}$  for MIOX-inositol.

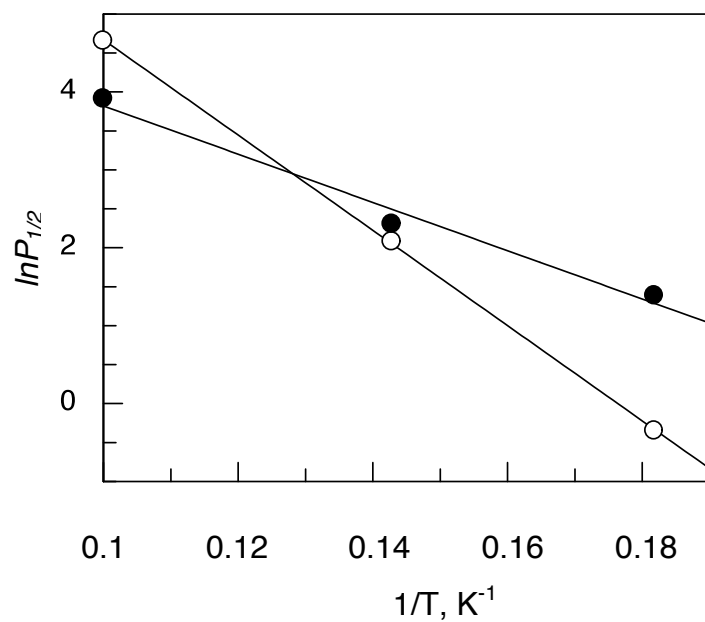

**Table S1.** Re-refinement statistics and quality of Mm-MIOX structure

|                                                        |                     |
|--------------------------------------------------------|---------------------|
| Resolution (highest resolution shell) (Å)              | 42.6-2.0 (2.09-2.0) |
| $R_{\text{cryst}}^{\#}$ (%) (highest resolution shell) | 21.0 (30.4)         |
| $R_{\text{free}}^{\#}$ (%) (highest resolution shell)  | 25.5 (31.0)         |
| RMS deviation from ideal geometry                      |                     |
| Bond lengths (Å)                                       | 0.005               |
| Bond angles (°)                                        | 0.76                |
| Average B-factors (Å <sup>2</sup> )                    | 56.5                |
| Ramachandran plot (favored, allowed, outliers)(%)*     | 96.9, 3.1, 0        |
| Wilson B-factor                                        | 26                  |

\* According to Molprobit (6)
